# Supplementary material
Source: PubMed Central journal article supplement (PMC6976794)
Supplement: mmc2.pdf [file mmc2.pdf]

# Ligand Entry into Fatty Acid Binding Protein via Local Unfolding Instead of Gap Widening

Tianshu Xiao,<sup>1</sup> Yimei Lu,<sup>1</sup> Jing-song Fan,<sup>1</sup> and Daiwen Yang<sup>1,\*</sup>

<sup>1</sup>Department of Biological Sciences, National University of Singapore, Singapore

**ABSTRACT** Fatty acid binding proteins play an important role in the transportation of fatty acids. Despite intensive studies, how fatty acids enter the protein cavity for binding is still controversial. Here, a gap-closed variant of human intestinal fatty acid binding protein was generated by mutagenesis, in which the gap is locked by a disulfide bridge. According to its structure determined here by NMR, this variant has no obvious openings as the ligand entrance and the gap cannot be widened by internal dynamics. Nevertheless, it still takes up fatty acids and other ligands. NMR relaxation dispersion, chemical exchange saturation transfer, and hydrogen-deuterium exchange experiments show that the variant exists in a major native state, two minor native-like states, and two locally unfolded states in aqueous solution. Local unfolding of either  $\beta$ B– $\beta$ D or helix 2 can generate an opening large enough for ligands to enter the protein cavity, but only the fast local unfolding of helix 2 is relevant to the ligand entry process.

**SIGNIFICANCE** Fatty acid binding proteins transport fatty acids to specific organelles in the cell. To enable the transport, fatty acids must enter and leave the protein cavity. Despite many studies, how fatty acids enter the protein cavity remains controversial. Using mutagenesis and biophysical techniques, we have resolved the disagreement and further showed that local unfolding of the second helix can generate a transient opening to allow ligands to enter the protein cavity. Because lipid binding proteins are highly conserved in the three-dimensional structure and ligand binding, all of them may use the same local unfolding mechanism for ligand uptake and release.

## INTRODUCTION

Fatty acid binding proteins (FABPs) are a family of specific carrier proteins that actively facilitate the transport of fatty acids to specific organelles in the cell for metabolism, storage, and signaling (1). They are critical mediators of metabolism and inflammatory processes and are considered promising therapeutic targets for metabolic diseases (2). Nine types of FABPs have been found in the cytosol of a variety of mammalian tissues (3). Different FABPs from humans share relatively low sequence identities, but they adopt similar three-dimensional (3D) structures with a slightly elliptical  $\beta$  barrel comprising two nearly orthogonal five-stranded  $\beta$ -sheets, a cap with two short  $\alpha$ -helices, and a large cavity filled with water (Fig. 1 A; (2,3)). Nearly all structures obtained in both crystal and solution states

show no obvious openings (4), but ligands can access the binding site located inside the cavity. Knowledge of how ligands enter the cavity is important for manipulating FABP's function by blocking the ligand entrance. Previous molecular dynamics (MD) studies suggested three possible ligand entry sites for ligand and water to enter into or exit from the protein cavity:  $E_I$ , located in the cap region involving the second  $\alpha$ -helix ( $\alpha 2$ ) and  $\beta$ C– $\beta$ D and  $\beta$ E– $\beta$ F turns;  $E_{II}$ , the gap between  $\beta$ D and  $\beta$ E; and  $E_{III}$ , in the area around the N-terminus (5–8). Very recently, our studies on human intestinal FABP (hIFABP) have showed that opening the cap by swinging the two helices away from the barrel is dispensable for ligands to enter the cavity and further demonstrated the existence of a minor conformational state that undergoes transient local unfolding in  $\alpha 2$  on a submillisecond timescale and thus provides a temporary opening in the  $E_I$  region for ligand entry (9). Our recent simulation work has also revealed that the  $\alpha 2$  tends to unfold more easily than other segments of the protein (10). Nevertheless, we could not exclude the presence of  $E_{II}$  and  $E_{III}$ .

Submitted September 25, 2019, and accepted for publication December 3, 2019.

\*Correspondence: [dbsydw@nus.edu.sg](mailto:dbsydw@nus.edu.sg)

Editor: Elizabeth Komives.

<https://doi.org/10.1016/j.bpj.2019.12.005>

© 2019 Biophysical Society.

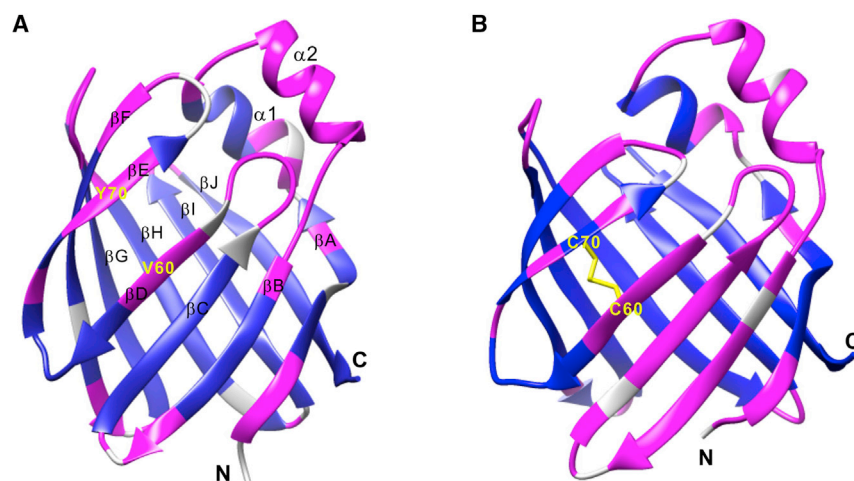

FIGURE 1 Structures of WT hIFABP (A) and its V60C/Y70C variant (B). Residues with HDX rates smaller than  $0.01 \text{ s}^{-1}$  are indicated in blue, otherwise in pink. The residues with unavailable data are in gray. The disulfide linkage is shown in yellow sticks. To see this figure in color, go online.

There is a gap in the  $\beta$ -sheet of the barrel structure, in which no main-chain hydrogen bonds exist between  $\beta$ D and  $\beta$ E (Fig. 1 A; (11)). This is common to intracellular lipid binding proteins including FABPs, suggesting that the gap may play a role in lipid uptake and release (11). Recent MD simulations on human heart FABP show that the gap between  $\beta$ D and  $\beta$ E can open to become significantly wider (5,8). In addition, MD simulations on a human myelin protein P2, which is a member of the FABP superfamily, indicate that a large-scale opening of the barrel between  $\beta$ D and  $\beta$ E can occur through moving the C-terminal region of  $\beta$ E and the N-terminal region of  $\beta$ F outwardly away from  $\beta$ D and  $\beta$ G (7). Upon this opening, the internalized cavity becomes accessible by ligands. Although computational studies suggest that the opening of the barrel is likely a general mechanism for ligand entry into FABPs, experimental evidence is still lacking.

To investigate if ligands indeed enter the cavity through  $E_{II}$  via widening the gap, here, we generated a gap-closed variant of hIFABP by introducing a disulfide linkage between  $\beta$ D and  $\beta$ E. Structure characterization reveals that the variant adopts a structure without obvious openings, and its gap cannot be widened substantially through internal dynamics. Similar to the wild-type (WT) hIFABP, the variant still takes up fatty acids and other ligands. Dynamics characterization shows that the variant exists in multiple conformational states in aqueous solution and the local unfolding process from the major native “closed” state to a minor “open” state with a locally unfolded helix 2 is relevant to ligand uptake and release.

## MATERIALS AND METHODS

### Protein sample preparation and NMR spectroscopy

The construct of hIFABP mutant V60C/Y70C was generated using a two-step polymerase chain reaction (PCR) scheme. The mutant (variant) was

expressed in *Escherichia coli*, purified, and delipidated using the protocol described previously (12). For structure determination, a  $^{13}\text{C}$ ,  $^{15}\text{N}$ -labeled sample was used to acquire NMR triple-resonance data including HNCA, HN(CO)CA, MQ-HCCH-TOCSY, and  $^{13}\text{C}$ ,  $^{15}\text{N}$ -edited NOESY (13,14). Using  $^{15}\text{N}$ -labeled samples, Car-Purcell-Meiboom-Gill (CPMG) and chemical exchange saturation transfer (CEST) experiments were conducted at  $30^\circ\text{C}$ , and amide hydrogen-deuterium exchange (HDX) experiments were conducted at  $25^\circ\text{C}$ . Unlabeled protein samples were used for stopped-flow and affinity measurement experiments at  $20^\circ\text{C}$ . All NMR experiments were performed on samples containing  $\sim 1 \text{ mM}$  protein,  $20 \text{ mM}$  sodium phosphate, and  $50 \text{ mM}$  NaCl on a Bruker 800 MHz instrument equipped with a cryoprobe. Except the samples used for HDX at pH 7.2 and for stopped-flow at pH 9.4, other samples were at pH 7.0.

The NMR data were processed using NMRPipe (15) and analyzed for resonance assignment using Sparky (16). NMR resonance assignment and structure determination of the V60C/Y70C variant was achieved using a NOESY-based strategy described previously (17). On the basis of distance constraints derived from unambiguous NOE assignments and dihedral angle constraints derived from chemical shifts, the structure was calculated with Xplor-NIH (18) using the standard simulated annealing method.

HDX rates were determined from NMR signal intensity changes with HDX time after dissolving lyophilized protein into heavy water solution. Each  $^1\text{H}$ - $^{15}\text{N}$  HSQC was acquired with an interscan delay of  $0.3 \text{ s}$  and four scans (total experimental time of  $149 \text{ s}$ ) using the so-fast HSQC scheme. Amide hydrogen exchange rates were measured in water solution using the radiation damping-based water inversion method (19).

$^{15}\text{N}$  relaxation dispersion (RD) data were acquired with a continuous wave decoupling and phase-cycled CPMG method (20,21) using a constant time relaxation delay of  $30 \text{ ms}$  and interscan delay of  $2 \text{ s}$ . RD data at 16 different CPMG fields from  $33.3$  to  $1000 \text{ Hz}$  were collected by varying the separation of CPMG pulses. To estimate uncertainties in the apparent relaxation rates, the measurements at a CPMG field of  $66.6 \text{ Hz}$  were repeated three times.

CEST profiles were obtained at two different weak saturation fields ( $13.6$  and  $27.2 \text{ Hz}$ ) with a saturation time of  $0.5 \text{ s}$  and interscan delay of  $1.5 \text{ s}$  (22,23). For each saturation field, 51 HSQC-based spectra were acquired using a series of  $^{15}\text{N}$  carrier frequencies ranging from  $106$  to  $131 \text{ ppm}$  at a spacing of  $0.5 \text{ ppm}$ . The uncertainties of the data points were estimated from the SD of the points over a region far away from CEST dips.

### RD and CEST data analysis

To extract conformational exchange parameters, RD and CEST data of the residues displaying three obvious CEST dips were simultaneously fitted to

the following four-state exchange model (Fig. 2) as described previously (24). Briefly, the data for each residue were fitted to estimate individual exchange rates ( $k_{ex1}$ ,  $k_{ex2}$ , and  $k_{ex3}$ ), populations ( $p_{I1}$ ,  $p_{I2}$ , and  $p_{I3}$ ), chemical shifts ( $\delta_{I1}$ ,  $\delta_{I2}$ , and  $\delta_{I3}$ ), intrinsic transverse relaxation rate ( $R_2$ ), and longitudinal relaxation rate ( $R_1$ ). From these estimations, initial values of the fitting parameters were determined roughly. Next, the data for all the residues were fitted globally to extract global kinetics parameters (exchange rates and populations) and residue-specific parameters (chemical shifts and relaxation rates). In the fitting, the  $R_2$  and  $R_1$  values for each residue were assumed to be independent of conformational states. Error estimation also followed the previous method (24).

For the residues showing a significant conformational exchange contribution to transverse relaxation ( $R_{ex}$ ) and exhibiting one or two CEST dips, their chemical shifts in the minor states were determined by fitting the RD and CEST data of each residue to the four-state model by fixing the exchange rates and populations of minor states at the values derived from the global fitting.

## Stopped flow

All the stopped-flow experiments were conducted on an Applied Photophysics spectrometer by mixing protein (4  $\mu$ M protein and 50 mM NaCl (pH 9.4)) and oleic acid (50 mM NaCl (pH 9.4)) solutions in equal volumes. At each oleic concentration, the experiment was repeated 10 times, and the average data were used for analysis. To extract apparent binding rates, each stopped-flow trace was fitted to the following mono- and biexponential functions:

$$\text{Fint}(t) = \text{Fint}_{\max} - \text{Fint}_1 * \exp(-k_1 t), \quad (1)$$

$$\text{Fint}(t) = \text{Fint}_{\max} - \text{Fint}_1 * \exp(-k_1 t) - \text{Fint}_2 * \exp(-k_2 t), \quad (2)$$

where  $\text{Fint}(t)$  is the fluorescence intensity of tryptophan residues observed at time  $t$ ,  $\text{Fint}_1$  and  $\text{Fint}_2$  are the fluorescence intensities associated with the first and second binding processes, respectively,  $k_1$  and  $k_2$  are the apparent association rates of the first and second binding processes, respectively, and  $\text{Fint}_{\max}$  is the fluorescence intensity in the equilibrium state.

## ANS titration

The binding affinity of 1-anilinonaphthalene-8-sulfonic acid (ANS) to the gap-closed variant was measured using a Shimadzu RF-5301 fluorescence spectrometer. The change of ANS fluorescence intensity with protein concentration ( $F(x)$ ) was fitted to a one-site binding model, as follows:

$$F(x) = \Delta A \left\{ L_0 + x + K_d - \left[ (L_0 + x + K_d)^2 - 4L_0x \right]^{0.5} \right\} / \times (2L_0), \quad (3)$$

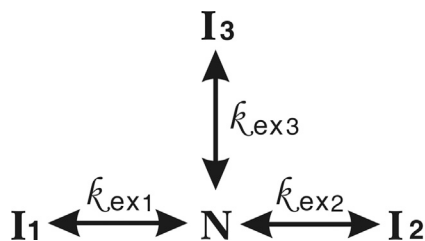

FIGURE 2 Four-state exchange model.  $k_{ex1}$  ( $k_{ex2}$ ,  $k_{ex3}$ ) is the total exchange rate between state N and state  $I_1$  ( $I_2$ ,  $I_3$ ).

where  $L_0$  is the total ANS concentration (1  $\mu$ M),  $x$  is the total protein concentration,  $K_d$  is the dissociation constant, and  $\Delta A$  is the difference of fluorescence intensities between the protein-free and protein-bound ANS.

## RESULTS AND DISCUSSION

### Structure of gap-closed hIFABP variant

A hIFABP mutant was generated by introducing a disulfide linkage between  $\beta$ D and  $\beta$ E, which was achieved by mutating V60 located in  $\beta$ D and Y70 in  $\beta$ E into cysteine (Fig. 1). The mutant displays substantially different  $^1\text{H}$ - $^{15}\text{N}$  NMR correlation spectra in the absence and presence of reducing agent dithiothreitol (Fig. S1), indicating that a disulfide bond exists in the mutant in the absence of reducing agents. The  $^{13}\text{C}_\beta$  chemical shifts of C60 (44.1 ppm) and C70 (45.3 ppm), which are typical for oxidized cysteine, further demonstrate the formation of a disulfide bond. To examine if the introduction of the disulfide bond induces structural changes, the structure of the mutant was solved based on distance and dihedral angle restraints obtained from triple-resonance NMR experiments (Table S1). The structure and NMR resonance assignments were deposited in the Protein Data Bank (PDB: 6L7K) and the Biological Magnetic Resonance Data Bank (BMRB: 36291), respectively. The mutant is very similar to the WT protein in overall structure (Fig. 1; Fig. S2) and has no obvious openings on the protein surface (Fig. S3). Introduction of the disulfide bond reduces the gap between  $\beta$ D and  $\beta$ E by  $\sim 1$  Å. Nevertheless, there are still no main-chain hydrogen bonds between  $\beta$ D and  $\beta$ E. In addition, the upper part of  $\beta$ B- $\beta$ D of the variant orientates slightly more outward than that of the WT hIFABP (Fig. S2). Because the middle of  $\beta$ D is connected with the middle of  $\beta$ E by a covalent linkage, widening of the gap between these two strands should be insignificant ( $< 1$  Å) by internal dynamics, if such an opening can happen. Thus, the V60C/Y70C hIFABP mutant is also referred to as gap-closed hIFABP variant.

### Binding of ligands to gap-closed hIFABP variant

Apart from fatty acids, FABPs also bind other lipophilic molecules such as 1-anilinonaphthalene-8-sulfonic acid (ANS) that is an excellent fluorescent probe. Previous studies have shown that ANS resides in the fatty acid binding site and binds IFABP in a 1:1 ratio, the same as fatty acids (12,25,26). In this study, ANS was used as a fatty acid analog to test ligand binding to the gap-closed variant. On the basis of fluorescence titration, the gap-closed variant still binds ANS (Fig. S4), even though  $\beta$ D and  $\beta$ E are covalently linked, and the gap cannot be widened more than 1 Å through internal dynamics. The variant with a disulfide bond has an ANS binding affinity of  $10.2 \pm 0.3$   $\mu$ M, which is similar to that for its reduced form without a disulfide linkage ( $11.2 \pm 0.4$   $\mu$ M) and larger than that for the WT protein ( $7.1 \pm 0.2$   $\mu$ M), suggesting that the side chains of

V60 or/and Y70 are likely involved in interactions with ANS. The results show that opening the  $\beta$  barrel between  $\beta$ D and  $\beta$ E is unnecessary for ligands to enter the protein cavity for binding and imply that opening another region should occur through protein structural changes.

### Coexistence of multiple conformational states of gap-closed hIFABP

Similar to WT hIFABP, the gap-closed variant has no obvious openings (Fig. S3). To reveal how ligands enter the cavity, we probed conformational exchanges of the variant using NMR RD and CEST experiments. 75 out of 131 residues displayed RD with  $R_{\text{ex}}$  values larger than  $3 \text{ s}^{-1}$  on an 800 MHz spectrometer (Fig. 3, a, c, e, and g), six residues had  $R_{\text{ex}}$  values between 2 and  $3 \text{ s}^{-1}$ , 31 residues had  $R_{\text{ex}}$  values smaller than  $2 \text{ s}^{-1}$ , and 18 residues with peak overlapping or weak signals were excluded for analysis. Here,  $R_{\text{ex}}$  is defined as  $R_2^{\text{eff}}(1000) - R_2^{\text{eff}}(33)$ , where  $R_2^{\text{eff}}(1000)$  and  $R_2^{\text{eff}}(33)$  are the relaxation rates measured at CPMG fields of 1000 and 33.3 Hz, respectively. The RD data indicate that at least one “invisible” state ( $I_1$ ) is in dynamic equilibrium with the observed native state (N) on a millisecond timescale. Among the 75 residues with  $R_{\text{ex}} > 3 \text{ s}^{-1}$ , 18 residues each exhibited three obvious dips (Fig. 3 d) that correspond to one native state and two minor states, 27 residues each displayed two obvious dips (Fig. 3, b and f), and 30 residues had only one dip (Fig. 3 h) in their CEST profiles. The CEST data suggest the presence of at least two additional “invisible” minor states ( $I_2$  and  $I_3$ )

that undergo conformational exchanges with state N on a subsecond timescale. To obtain structural information of the “invisible” states and kinetics parameters for conformational exchange processes, a four-state model (Fig. 2) was used to fit both the CEST and RD data simultaneously.

Fitting the data from all the residues with three obvious dips globally, we obtained populations of states  $I_1$ ,  $I_2$ , and  $I_3$  ( $p_{I1} = 3.4 \pm 0.3\%$ ,  $p_{I2} = 5.3 \pm 0.2\%$ , and  $p_{I3} = 1.8 \pm 0.9\%$ ) and their respective exchange rates with state N ( $k_{\text{ex}1} = 1629 \pm 116 \text{ s}^{-1}$ ,  $k_{\text{ex}2} = 82 \pm 5 \text{ s}^{-1}$ , and  $k_{\text{ex}3} = 16 \pm 8 \text{ s}^{-1}$ ).  $^{15}\text{N}$  chemical shifts of the minor states determined from the data fitting are listed in Table S2. Although only one set of RD data recorded on a single static magnetic field was used to determine the parameters associated with the intermediate exchange process ( $k_{\text{ex}1}$ ,  $p_{I1}$ , and  $\delta_{I1}$ ), the parameters obtained by fitting globally the data from 18 residues had relatively small uncertainties. Using simulated data, we have recently also demonstrated that reliable kinetics parameters and chemical shifts can be obtained by fitting RD data on a single magnetic field from multiple residues ( $>10$ ) to a global exchange model (9). For other residues with 1–2 CEST dips as well as  $R_{\text{ex}} > 2 \text{ s}^{-1}$ , their chemical shifts in minor states were obtained from data analysis by fixing  $k_{\text{ex}1}$ ,  $p_{I1}$ ,  $k_{\text{ex}2}$ ,  $p_{I2}$ ,  $k_{\text{ex}3}$ , and  $p_{I3}$  at the values derived from the global fitting, which are also listed in Table S2.

Folded and unfolded proteins have very distinct  $^{15}\text{N}$  chemical shifts. Comparing chemical shifts of the minor and native states (Table S2), we can see that states  $I_1$  and  $I_2$  are much more similar to state N than unfolded state U (Fig. 4, A–D), but state  $I_3$  is significantly different from

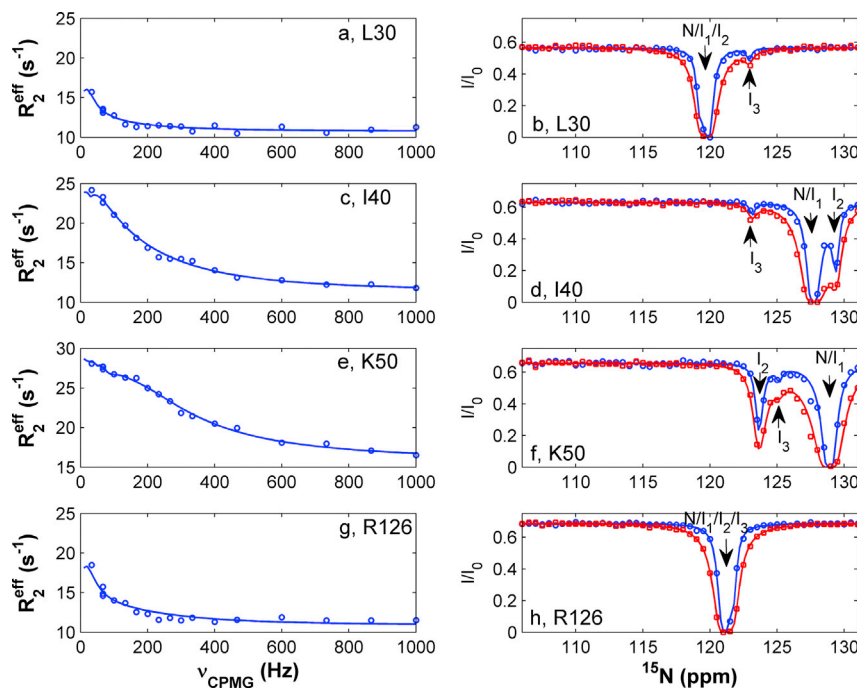

FIGURE 3 Representative RD (a, c, e, and g) and CEST (b, d, f, and h) profiles. The experimental CEST data at radio frequency fields of 13.6 and 27.2 Hz are indicated by “o” and “□” respectively. The solid lines are best fits obtained with a four-state model. The locations (or chemical shifts) of states N,  $I_1$ ,  $I_2$ , and  $I_3$  in the CEST profiles are indicated by arrows. To see this figure in color, go online.

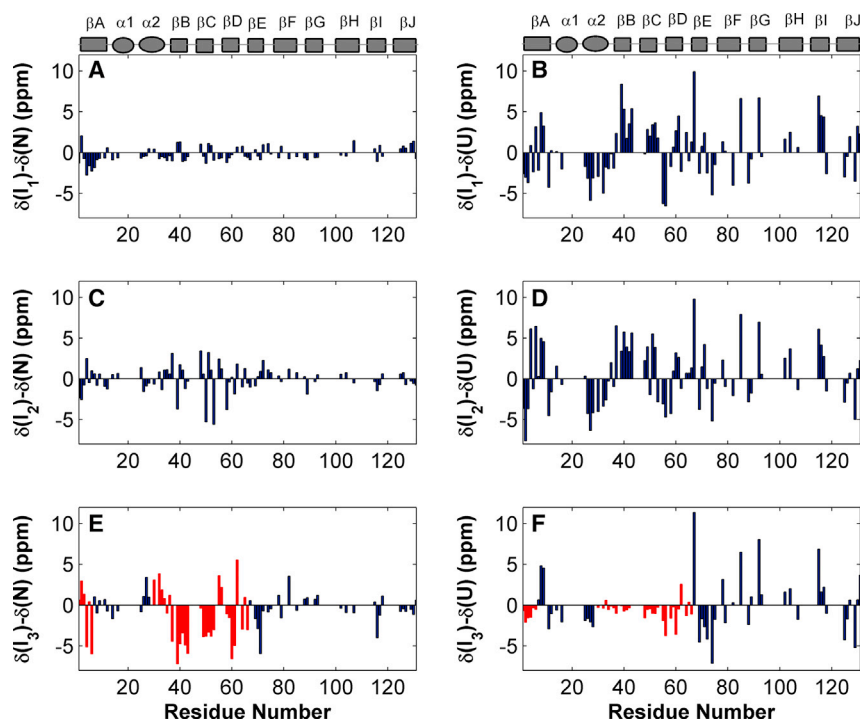

FIGURE 4 Differences of  $^{15}\text{N}$  chemical shifts between states  $I_1$  and N (A), between state  $I_1$  and unfolded state (U) (B), between states  $I_2$  and N (C), between states  $I_2$  and U (D), between states  $I_3$  and N (E), and between states  $I_3$  and U (F). In (E) and (F), the residues in the N-terminal region of  $\beta\text{A}$ , C-terminal region of  $\alpha\text{2}$ , and  $\beta\text{B}$ - $\beta\text{D}$  are marked in red. Secondary structure elements are shown on the tops of (A) and (B). To see this figure in color, go online.

both states N and U (Fig. 4, E and F). The chemical shift differences between states  $I_3$  and N were also mapped onto the 3D structure to visualize the location of the residues with significant shift differences (Fig. S5). For state  $I_3$ , residues located in the N-terminal region of  $\beta\text{A}$  (F2–W6),  $\beta\text{B}$ - $\beta\text{D}$  (N35–L64) and C-terminal end of  $\alpha\text{2}$  (L30–D34) are similar to the unfolded state; C70–N71 in the C-terminal region of  $\beta\text{E}$  and T116 in  $\beta\text{I}$  are different from both the unfolded and native states, and residues located in other regions are similar to the native state in terms of  $^{15}\text{N}$  chemical shift (Fig. 4, E and F). For instance, the chemical shifts of residues K37–E43 in state  $I_3$  each differ from those in state N by more than 3.4 ppm but deviate from those in state U by less than  $\sim 1.0$  ppm (Fig. 4, E and F; Table S2). Therefore, states  $I_1$  and  $I_2$  are native like, whereas state  $I_3$  is partially unfolded, in which the N-terminal region of  $\beta\text{A}$ ,  $\beta\text{B}$ - $\beta\text{D}$ , and the C-terminal end of  $\alpha\text{2}$  are mainly disordered. The unfolding rate from state N to state  $I_3$  is  $\sim 0.3 \text{ s}^{-1}$  ( $p_{I_3} \cdot k_{\text{ex}3}$ ), significantly smaller than the conversion rates from state N to  $I_1$  ( $\sim 55 \text{ s}^{-1}$ ) and  $I_2$  ( $4 \text{ s}^{-1}$ ).

To examine if there are other conformational exchanges in the gap-closed variant, amide hydrogen exchange experiments were performed. 62 out of 131 residues displayed  $^1\text{H}$ - $^{15}\text{N}$  correlations in the first HDX spectrum, which was recorded with a total acquisition time of 149 s and a dead time of  $\sim 160$  s. Their HDX rates are listed in Table S3. For other residues with HDX rates larger than  $0.2 \text{ s}^{-1}$ , the exchange rates of their backbone amides with water hydrogen were measured (Table S3). As expected, the residues not involved in H-bonding have large amide hydrogen

exchange rates and small protection factors (PFs). Interestingly, all residues located in  $\alpha\text{2}$ ,  $\beta\text{B}$ , and  $\beta\text{C}$  of the gap-closed variant have small PFs ( $< 100$ ) (Fig. 1; Table S3), even though their backbone amides are involved in H-bonding in state N. In contrast, most residues located in  $\beta\text{B}$  and  $\beta\text{C}$  of the WT hIFABP and its cap-closed variant have very large PFs ( $> 1000$ ) (Fig. 1; (9,24)). The exchange rates for most residues at pH 7.2 were 1.4–2.0 times as large as those measured at pH 7.0 (Table S3), indicating that the amide hydrogen exchange can be described by the EX2 model (27). Using this model, the population of an amide in a disordered form can be approximated as  $1/\text{PF}$ . According to the PFs of the amides involved in H-bonding (Table S3), the populations of the disordered form were  $\sim 15$ – $30\%$  for  $\alpha\text{2}$ ,  $\sim 2\%$  for N-terminal region of  $\beta\text{A}$ ,  $\sim 0.5$ – $8\%$  for  $\beta\text{B}$  and  $\beta\text{C}$ , and  $< 0.1\%$  for  $\alpha\text{1}$  and  $\beta\text{F}$ - $\beta\text{J}$ . It is noteworthy that the populations estimated from the PFs are error prone, strongly depending on the predicted exchange rates. This result further supports that states  $I_1$  ( $p_{I_1} = 3.4\%$ ) and  $I_2$  ( $p_{I_2} = 5.3\%$ ) are native like rather than unfolded, whereas state  $I_3$  ( $p_{I_3} = 1.8\%$ ) is partially unfolded, in which  $\beta\text{B}$ ,  $\beta\text{C}$ , and  $\alpha\text{2}$  are mainly disordered.

The population of the disordered form for  $\alpha\text{2}$  estimated from PFs ( $\sim 15$ – $30\%$ ) is much larger than the population of state  $I_3$  derived from our CEST data (1.8%), suggesting the presence of an additional state in which only  $\alpha\text{2}$  is disordered. This locally unfolded state is denoted as  $I_4$ . Because state  $I_4$  was not observed by CEST and RD experiments, its exchange rate with state N should be significantly smaller than  $k_{\text{ex}3}$  ( $16 \text{ s}^{-1}$ ) or much larger than  $k_{\text{ex}1}$  ( $1600 \text{ s}^{-1}$ ). In

the former case (slow exchange regime), the residues in  $\alpha 2$  should give rise to two sets of  $^1\text{H}$ - $^{15}\text{N}$  correlation peaks corresponding to states N and locally unfolded  $I_4$ . In fact, only one set of peaks corresponding to state N were observed, indicating that state  $I_4$  must undergo a fast exchange with state N. This fast exchange should be on the microsecond timescale so that the exchange could not be detected by  $^{15}\text{N}$  CPMG experiments.

### Functionally relevant conformational exchange

The partially unfolded state  $I_3$  should have an opening large enough for ligands to enter the protein cavity. To examine if this partial unfolding process is relevant to the uptake of fatty acids, we measured the apparent association rate of oleic acid binding to the gap-closed hIFABP using fluorescence stopped flow. The stopped-flow profiles could be fitted well to a biexponential function instead of monoexponential function when oleic acid concentrations were lower than  $25\ \mu\text{M}$  (Fig. S6). The F-statistics derived from the bi- and mono-exponential models were much larger than the critical value (7.0) at a confidence level of 99.9% (Table S4), rejecting the monoexponential model. This suggests that the ligand binds the protein in at least two steps. At higher oleic acid concentrations, the intrinsic protein fluorescence signal started to decay after a mixing time of  $\sim 4\ \text{ms}$  (Fig. S6) because of the quenching effect, which was not observed for the WT protein (9). In this case, only the apparent association rate for the fast step could be estimated. The fast apparent rates increased with oleic acid concentrations initially and then gradually reached a plateau with a further increase of ligand concentration (Fig. 5). This result suggests that there is a rate-limiting step before the ligand association step, and the rate limit is  $\sim 1000\ \text{s}^{-1}$  for the gap-closed variant. On the other hand, the rates for the

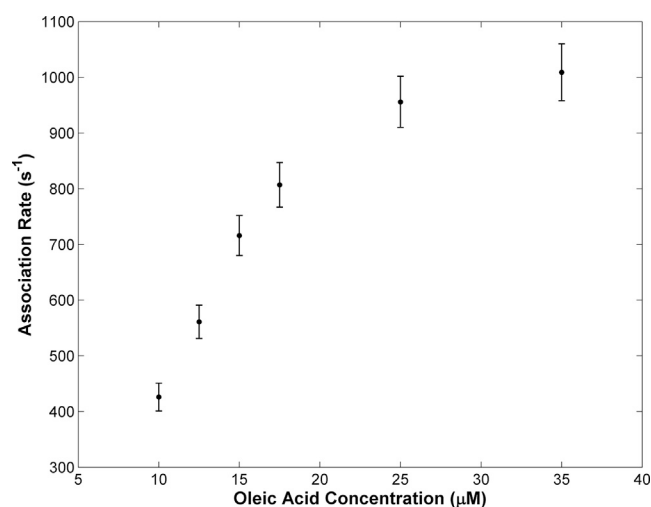

FIGURE 5 Dependences of apparent association rates for the fast step on ligand concentrations. The experimental data are shown in filled dots. The vertical bars indicate the errors of the association rates.

second association step were small ( $\sim 20\ \text{s}^{-1}$ ) and nearly independent of ligand concentrations (Table S4).

The binding kinetics results for the gap-closed mutant are similar to those for the cap-closed mutant and WT protein (9). Therefore, the three-step binding model for the cap-closed variant described previously should be applicable to this gap-closed variant too. In this model, the maximal apparent association rate for the fast step should be smaller than the conversion rate from a closed state to an open state because the protein stays mainly in a closed state. In fact, the maximal apparent association rate ( $\sim 1000\ \text{s}^{-1}$ ) is much larger than the conversion rates from state N to  $I_1$ ,  $I_2$ , and  $I_3$  ( $< 55\ \text{s}^{-1}$ ). So the local unfolding process from state N to  $I_3$  and the other two conformational exchange processes revealed by RD and CEST are irrelevant to the ligand entry for the gap-closed variant. The results also suggest that states  $I_1$ ,  $I_2$ , and  $I_3$  are not involved in the ligand binding process. Although these three minor states are unnecessary for the binding of small molecules to IFABP, they may play a role in interactions with IFABP binding proteins. Different from state  $I_3$ , state  $I_4$  with a disordered  $\alpha 2$  is in fast exchange with state N, which is similar to the locally unfolded state of the cap-closed variant. In common with WT hIFABP and its cap-closed variants, the gap-closed variant has PF values smaller than 100 for R28-A32 in  $\alpha 2$  but larger than 1000 for V17-M21 in  $\alpha 1$  (9,24), even though the amides of these residues are all involved in H-bonding and have similar water accessibility in state N, suggesting the presence of a common minor state with locally unfolded  $\alpha 2$  for all hIFABP proteins. Our recent study (9) on the cap-closed mutant showed that local unfolding of  $\alpha 2$  is the rate-limiting step for ligands to enter the hIFABP cavity for binding. Therefore, it is reasonable to assume that the unfolding of  $\alpha 2$  also controls the entry of ligands into the gap-closed variant, and the conversion rate from state N to  $I_4$  is similar to the maximal ligand association rate ( $\sim 1000\ \text{s}^{-1}$ ). State  $I_4$  not only contains an opening through which ligands can enter the cavity of IFABP for binding but also undergoes conformational exchange with state N rapidly. This means that state  $I_4$  is an indispensable intermediate state for ligands to bind IFABP. Currently, FABP inhibitors are designed based on the ligand binding site inside the protein cavity (28). Our study suggests an alternative type of inhibitors that can stabilize  $\alpha 2$  and suppress state  $I_4$ , in turn preventing fatty acids from entering the FABP cavity for binding.

### CONCLUSIONS

In summary, we have generated a gap-closed hIFABP variant with a disulfide linkage between strands  $\beta\text{D}$  and  $\beta\text{E}$ , which has a similar 3D structure to the WT protein and has no obvious opening on its surface. The variant always stays in a gap-closed state because of the presence of the disulfide linkage, but it still takes up fatty acids and other lipophilic ligands. Thus, ligands do not enter the

protein cavity for binding via opening the gap, rejecting the previously proposed gap-opening mechanism. The native state of the gap-closed variant (N) is in dynamic equilibrium with two minor native-like states ( $I_1$  and  $I_2$ ), one locally unfolded state in which the N-terminal region of  $\beta A$ ,  $\beta B$ – $\beta D$ , and  $\alpha 2$  are mainly disordered ( $I_3$ ) and one locally unfolded state in which  $\alpha 2$  is mainly disordered ( $I_4$ ). The conversion rate from state N to  $I_3$  ( $0.3 \text{ s}^{-1}$ ) is much smaller than the apparent association rate of oleic acid, indicating that ligands do not enter the protein cavity through the opening created by local unfolding of the  $\beta B$ – $\beta D$  region. Local unfolding of  $\alpha 2$  is fast and thus relevant to the ligand entry process.

## SUPPORTING MATERIAL

Supporting Material can be found online at <https://doi.org/10.1016/j.bpj.2019.12.005>.

## AUTHOR CONTRIBUTIONS

D.Y. designed the research. T.X. and Y.L. performed the experiments and analyzed the data. J.S.F. analyzed the NOESY data and calculated the structure. Y.L. and D.Y. wrote the manuscript.

## ACKNOWLEDGMENTS

This work was supported by Singapore Ministry of Education, Academic Research Fund Tier 2 (MOE2017-T2-1-125).

## REFERENCES

- Zimmerman, A. W., and J. H. Veerkamp. 2002. New insights into the structure and function of fatty acid-binding proteins. *Cell. Mol. Life Sci.* 59:1096–1116.
- Hotamisligil, G. S., and D. A. Bernlohr. 2015. Metabolic functions of FABPs—mechanisms and therapeutic implications. *Nat. Rev. Endocrinol.* 11:592–605.
- Hertzfel, A. V., and D. A. Bernlohr. 2000. The mammalian fatty acid-binding protein multigene family: molecular and genetic insights into function. *Trends Endocrinol. Metab.* 11:175–180.
- Sacchettini, J. C., J. I. Gordon, and L. J. Banaszak. 1989. Crystal structure of rat intestinal fatty-acid-binding protein. Refinement and analysis of the Escherichia coli-derived protein with bound palmitate. *J. Mol. Biol.* 208:327–339.
- Matsuoka, D., S. Sugiyama, ..., S. Matsuoka. 2015. Molecular dynamics simulations of heart-type fatty acid binding protein in apo and holo forms, and hydration structure analyses in the binding cavity. *J. Phys. Chem. B.* 119:114–127.
- Long, D., Y. Mu, and D. Yang. 2009. Molecular dynamics simulation of ligand dissociation from liver fatty acid binding protein. *PLoS One.* 4:e6081.
- Laulumaa, S., T. Nieminen, ..., P. Kursula. 2018. Structure and dynamics of a human myelin protein P2 portal region mutant indicate opening of the  $\beta$  barrel in fatty acid binding proteins. *BMC Struct. Biol.* 18:8.
- Guo, Y., M. Duan, and M. Yang. 2019. The observation of ligand-binding-relevant open states of fatty acid binding protein by molecular dynamics simulations and a Markov state model. *Int. J. Mol. Sci.* 20:E3476.
- Xiao, T., J. S. Fan, ..., D. Yang. 2016. Local unfolding of fatty acid binding protein to allow ligand entry for binding. *Angew. Chem. Int. Engl.* 55:6869–6872.
- Cheng, P., D. Liu, ..., D. Long. 2019. Atomistic insights into the functional instability of the second helix of fatty acid binding protein. *Biophys. J.* 117:239–246.
- Sacchettini, J. C., J. I. Gordon, and L. J. Banaszak. 1988. The structure of crystalline Escherichia coli-derived rat intestinal fatty acid-binding protein at 2.5-Å resolution. *J. Biol. Chem.* 263:5815–5819.
- Long, D., and D. Yang. 2010. Millisecond timescale dynamics of human liver fatty acid binding protein: testing of its relevance to the ligand entry process. *Biophys. J.* 98:3054–3061.
- Yang, D., Y. Zheng, ..., D. F. Wyss. 2004. Sequence-specific assignments of methyl groups in high-molecular weight proteins. *J. Am. Chem. Soc.* 126:3710–3711.
- Xu, Y., D. Long, and D. Yang. 2007. Rapid data collection for protein structure determination by NMR spectroscopy. *J. Am. Chem. Soc.* 129:7722–7723.
- Delaglio, F., S. Grzesiek, ..., A. Bax. 1995. NMRPipe: a multidimensional spectral processing system based on UNIX pipes. *J. Biomol. NMR.* 6:277–293.
- Lee, W., M. Tonelli, and J. L. Markley. 2015. NMRFAM-SPARKY: enhanced software for biomolecular NMR spectroscopy. *Bioinformatics.* 31:1325–1327.
- Xu, Y., Y. Zheng, ..., D. Yang. 2006. A new strategy for structure determination of large proteins in solution without deuteration. *Nat. Methods.* 3:931–937.
- Schwieters, C. D., J. J. Kuszewski, and G. M. Clore. 2006. Using Xplor-NIH for NMR molecular structure determination. *Prog. Nucl. Magn. Reson. Spectrosc.* 48:47–62.
- Fan, J. S., J. Lim, ..., D. Yang. 2011. Measurement of amide hydrogen exchange rates with the use of radiation damping. *J. Biomol. NMR.* 51:151–162.
- Jiang, B., B. Yu, ..., D. Yang. 2015. A  $(15)\text{N}$  CPMG relaxation dispersion experiment more resistant to resonance offset and pulse imperfection. *J. Magn. Reson.* 257:1–7.
- Long, D., M. Liu, and D. Yang. 2008. Accurately probing slow motions on millisecond timescales with a robust NMR relaxation experiment. *J. Am. Chem. Soc.* 130:2432–2433.
- Vallurupalli, P., G. Bouvignies, and L. E. Kay. 2012. Studying “invisible” excited protein states in slow exchange with a major state conformation. *J. Am. Chem. Soc.* 134:8148–8161.
- Lim, J., T. Xiao, ..., D. Yang. 2014. An off-pathway folding intermediate of an acyl carrier protein domain coexists with the folded and unfolded states under native conditions. *Angew. Chem. Int. Engl.* 53:2358–2361.
- Yu, B., and D. Yang. 2016. Coexistence of multiple minor states of fatty acid binding protein and their functional relevance. *Sci. Rep.* 6:34171.
- Kirk, W. R., E. Kurian, and F. G. Prendergast. 1996. Characterization of the sources of protein-ligand affinity: 1-sulfonato-8-(1')anilinonaphthalene binding to intestinal fatty acid binding protein. *Biophys. J.* 70:69–83.
- Velkov, T., S. Chuang, ..., M. J. Scanlon. 2005. The interaction of lipophilic drugs with intestinal fatty acid-binding protein. *J. Biol. Chem.* 280:17769–17776.
- Krishna, M. M., L. Hoang, ..., S. W. Englander. 2004. Hydrogen exchange methods to study protein folding. *Methods.* 34:51–64.
- Furuhashi, M., G. Tuncman, ..., G. S. Hotamisligil. 2007. Treatment of diabetes and atherosclerosis by inhibiting fatty-acid-binding protein aP2. *Nature.* 447:959–965.

**Biophysical Journal, Volume 118**

**Supplemental Information**

**Ligand Entry into Fatty Acid Binding Protein via Local Unfolding Instead of Gap Widening**

**Tianshu Xiao, Yimei Lu, Jing-song Fan, and Daiwen Yang**



Table S1. Structural statistics for the final 20 conformers of hIFABP V60C/Y70C variant <sup>a</sup>

|                                                                                   |                   |
|-----------------------------------------------------------------------------------|-------------------|
| Distance restraints                                                               |                   |
| Intra-residue ( $i-j = 0$ )                                                       | 383               |
| Sequential ( $ i-j  = 1$ )                                                        | 427               |
| Medium range ( $2 \leq  i-j  \leq 4$ )                                            | 113               |
| Long range ( $ i-j  \geq 5$ )                                                     | 354               |
| Hydrogen bond                                                                     | 124               |
| Total                                                                             | 1401              |
| Dihedral angle restraints                                                         |                   |
| $\phi$                                                                            | 115               |
| $\psi$                                                                            | 115               |
| Average rmsd to the mean structure (Å) <sup>b</sup>                               |                   |
| Backbone atoms                                                                    | $0.69 \pm 0.13$   |
| Heavy atoms                                                                       | $1.53 \pm 0.14$   |
| $\phi/\psi$ space <sup>c</sup>                                                    |                   |
| Most favored region (%)                                                           | 72.5              |
| Additionally allowed region (%)                                                   | 22.9              |
| Generously allowed region (%)                                                     | 2.6               |
| Disallowed region (%)                                                             | 2.1               |
| rmsd from covalent geometry                                                       |                   |
| Bonds (Å)                                                                         | $0.003 \pm 0.000$ |
| Angles (deg.)                                                                     | $0.337 \pm 0.011$ |
| Impropers (deg.)                                                                  | $0.291 \pm 0.015$ |
| rmsd from experimental restraints                                                 |                   |
| NOEs (Å)                                                                          | $0.043 \pm 0.000$ |
| Dihedral angles (deg.)                                                            | $0.809 \pm 0.019$ |
| <sup>a</sup> Selected from 100 calculated conformers according to overall energy. |                   |
| <sup>b</sup> Calculated with MOLMOL over the structure region (3-131).            |                   |
| <sup>c</sup> Calculated with PROCHECK-NMR.                                        |                   |

Table S2.  $^{15}\text{N}$  chemical shifts of major native state (N), minor states (I<sub>1</sub>, I<sub>2</sub>, and I<sub>3</sub>), and unfolded state (U).

| Residue | N<br>(ppm) | I <sub>1</sub><br>(ppm) | I <sub>2</sub><br>(ppm) | I <sub>3</sub><br>(ppm) | U<br>(ppm) <sup>a</sup> | Structure |
|---------|------------|-------------------------|-------------------------|-------------------------|-------------------------|-----------|
| F2      | 114.19     | 116.23                  | 111.65                  | 117.18                  | 119.272                 | βA        |
| D3      | 119.04     | 118.29                  | 118.28                  | 120.40                  | 121.971                 |           |
| S4      | 120.18     | 117.41                  | 122.68                  | 115.04                  | 116.534                 |           |
| T5      | 115.69     | 114.06                  | 115.22                  | 116.11                  | 116.443                 |           |
| W6      | 128.15     | 125.87                  | 129.14                  | 122.18                  | 122.706                 |           |
| K7      | 122.87     | 121.02                  | 123.5                   | 123.88                  | 123.208                 |           |
| V8      | 127.24     | 126.36                  | 126.41                  | 126.29                  | 121.446                 |           |
| D9      | 128.13     | 127.41                  | 128.72                  | 128.69                  | 124.144                 |           |
| R10     | 112.89     | n                       | n                       | n                       | 122.72                  |           |
| S11     | 113.57     | 112.89                  | 112.65                  | 114.26                  | 117.18                  |           |
| E12     | 122.32     | 122.91                  | 121.06                  | 121.59                  | 122.652                 |           |
| N13     | -          | -                       | -                       | -                       | 118.90                  |           |
| Y14     | 121.22     | 120.30                  | 121.75                  | 119.57                  | 114.42                  | α1        |
| D15     | 118.32     | n                       | n                       | n                       | 121.98                  |           |
| K16     | 120.10     | 119.45                  | 120.76                  | 119.39                  | 121.46                  |           |
| F17     | 121.43     | n                       | n                       | n                       | 121.28                  |           |
| M18     | 118.16     | n                       | n                       | n                       | 122.32                  |           |
| E19     | 119.96     | n                       | n                       | n                       | 121.58                  |           |
| K20     | 122.67     | n                       | n                       | n                       | 122.31                  |           |
| M21     | 115.78     | n                       | n                       | n                       | 121.57                  |           |
| G22     | 108.17     | -                       | -                       | -                       | 110.30                  |           |
| V23     | 121.16     | 120.54                  | 121.40                  | 120.08                  | 120.15                  |           |
| N24     | 125.93     | 125.13                  | 127.38                  | 124.43                  | 122.83                  |           |
| I25     | 121.29     | 120.60                  | 122.68                  | 120.45                  | 122.34                  | α2        |
| V26     | 121.82     | 121.33                  | 120.24                  | 122.89                  | 124.51                  |           |
| K27     | 120.08     | 119.67                  | 119.21                  | 123.49                  | 125.55                  |           |
| R28     | 119.66     | 120.15                  | 119.12                  | 120.63                  | 123.29                  |           |
| K29     | 119.81     | -                       | -                       | -                       | 122.68                  |           |
| L30     | 119.83     | 120.26                  | 119.18                  | 122.92                  | 123.20                  |           |
| A31     | 121.05     | 121.57                  | 120.67                  | 123.90                  | 124.37                  |           |
| A32     | 118.77     | 118.00                  | 119.63                  | 122.62                  | 123.01                  |           |
| H33     | 116.89     | 116.37                  | 115.56                  | 118.76                  | 118.16                  |           |
| D34     | 119.81     | 119.18                  | 120.89                  | 120.63                  | 121.17                  |           |
| N35     | 119.84     | 118.83                  | 120.98                  | 118.86                  | 119.00                  |           |
| L36     | 120.67     | 120.28                  | 121.27                  | 121.87                  | 122.22                  | βB        |
| K37     | 125.18     | 124.14                  | 128.3                   | 120.75                  | 121.77                  |           |
| L38     | 126.16     | -                       | -                       | -                       | 123.07                  |           |
| I40     | 127.66     | 128.96                  | 129.4                   | 122.92                  | 123.65                  |           |
| T41     | 121.56     | 120.48                  | 122.64                  | 118.13                  | 118.73                  |           |
| Q42     | 127.50     | 126.50                  | 126.28                  | 122.59                  | 122.94                  |           |
| E43     | 128.06     | 127.53                  | 127.76                  | 122.12                  | 122.12                  |           |
| G44     | 117.60     | -                       | -                       | -                       | 109.12                  |           |
| N45     | 125.20     | -                       | -                       | -                       | 118.44                  |           |

|     |        |        |        |        |        |    |
|-----|--------|--------|--------|--------|--------|----|
| K46 | 120.61 | n      | n      | n      | 121.69 | βC |
| F47 | 126.15 | -      | -      | -      | 121.55 |    |
| T48 | 115.67 | 116.68 | 119.10 | 115.28 | 116.85 |    |
| V49 | 126.65 | 126.17 | 127.25 | 122.76 | 123.32 |    |
| K50 | 128.95 | 127.63 | 123.65 | 125.14 | 125.60 |    |
| E51 | 125.40 | 126.52 | 128.64 | 122.11 | 123.11 |    |
| S52 | 120.16 | 121.03 | 121.25 | 116.35 | 117.39 |    |
| S53 | 120.83 | 119.88 | 115.25 | 117.82 | 118.08 |    |
| A54 | -      | -      | -      | -      | 125.75 |    |
| F55 | 113.76 | 112.99 | 116.18 | 117.38 | 119.26 |    |
| R56 | 116.65 | 116.01 | 117.86 | 118.82 | 122.56 | βD |
| N57 | -      | -      | -      | -      | 120.17 |    |
| I58 | 121.51 | 120.27 | 117.73 | 120.42 | 122.02 |    |
| E59 | 126.04 | 125.38 | 125.65 | 124.48 | 124.70 |    |
| C60 | 122.73 | 122.43 | 122.95 | 116.17 | 119.76 |    |
| V61 | 126.06 | 126.07 | 124.20 | 121.11 | 121.57 |    |
| F62 | 121.27 | 121.95 | 123.10 | 126.83 | 124.27 |    |
| E63 | 119.90 | 120.50 | 120.32 | 119.40 | 123.32 |    |
| L64 | 124.63 | 125.40 | 123.64 | 121.65 | 122.95 |    |
| G65 | 108.90 | 108.42 | 110.17 | 109.84 | 109.46 |    |
| V66 | 122.31 | 121.72 | 121.78 | 119.30 | 120.42 | βE |
| T67 | 129.49 | 128.61 | 128.47 | 130.04 | 118.68 |    |
| F68 | 126.16 | -      | -      | -      | 123.37 |    |
| N69 | 117.55 | 117.89 | 116.68 | 115.90 | 120.44 |    |
| C70 | 119.23 | 118.79 | 119.5  | 116.34 | 118.03 |    |
| N71 | 122.77 | 121.88 | 123.71 | 116.81 | 119.48 |    |
| L72 | 118.94 | 119.91 | 121.2  | 118.24 | 122.41 |    |
| A73 | -      | -      | -      | -      | 124.33 |    |
| D74 | 112.86 | 113.95 | 113.96 | 112    | 119.15 |    |
| G75 | 107.95 | 107.77 | 108.71 | 107.51 | 109.27 |    |
| T76 | 119.81 | -      | -      | -      | 114.42 | βF |
| E77 | 128.91 | 128.46 | 128.60 | 129.35 | 123.32 |    |
| L78 | 125.01 | 124.37 | 125.37 | 126.21 | 123.05 |    |
| R79 | 121.03 | 121.80 | 120.67 | 119.46 | 121.62 |    |
| G80 | 116.16 | n      | n      | n      | 109.96 |    |
| T81 | 107.53 | 107.95 | 107.81 | 106.86 | 114.35 |    |
| W82 | 119.59 | 118.81 | 120.79 | 123.14 | 122.84 |    |
| S83 | 115.75 | n      | n      | n      | 117.28 |    |
| L84 | 126.00 | n      | n      | n      | 109.12 |    |
| E85 | 128.33 | 127.80 | 129.09 | 127.67 | 121.17 |    |
| G86 | 117.60 | -      | -      | -      | 109.14 |    |
| N87 | 123.29 | -      | -      | -      | 118.44 |    |
| K88 | 118.57 | 117.90 | 118.82 | 119.30 | 121.66 | βG |
| L89 | 123.30 | 122.40 | 121.42 | 124.23 | 123.20 |    |
| I90 | 125.44 | n      | n      | n      | 121.51 |    |
| G91 | 122.01 | 122.43 | 122.30 | 120.41 | 112.62 |    |
| K92 | 128.43 | 127.81 | 128.06 | 129.14 | 121.09 |    |
| F93 | 121.41 | 120.82 | 121.9  | 122.61 | 121.34 |    |

|      |        |        |        |        |        |    |
|------|--------|--------|--------|--------|--------|----|
| K94  | 119.29 | n      | n      | n      | 123.35 |    |
| R95  | 121.88 | n      | n      | n      | 122.52 |    |
| T96  | 115.59 | n      | n      | n      | 116.01 |    |
| D97  | 120.72 | n      | n      | n      | 122.52 |    |
| N98  | 116.85 | n      | n      | n      | 119.18 |    |
| G99  | 108.17 | -      | -      | -      | 108.68 |    |
| N100 | 119.59 | n      | n      | n      | 118.46 | βH |
| E101 | 120.42 | n      | n      | n      | 121.12 |    |
| L102 | 124.73 | 124.38 | 125.29 | 124.34 | 122.73 |    |
| N103 | 124.73 | n      | n      | n      | 119.32 |    |
| T104 | 118.19 | 117.74 | 118.94 | 117.27 | 115.25 |    |
| V105 | 127.09 | n      | n      | n      | 123.28 |    |
| R106 | 124.62 | n      | n      | n      | 125.28 |    |
| E107 | 122.14 | 123.59 | 121.62 | 121.21 | 122.96 |    |
| I108 | 125.20 | -      | -      | -      | 122.19 |    |
| I109 | 130.33 | n      | n      | n      | 124.96 |    |
| G110 | 119.29 | n      | n      | n      | 112.68 |    |
| D111 | 125.20 | -      | -      | -      | 119.88 |    |
| E112 | 118.83 | 118.83 | 119.19 | 118.09 | 121.22 | βI |
| L113 | 123.86 | n      | n      | n      | 123.02 |    |
| V114 | 128.32 | n      | n      | n      | 121.05 |    |
| Q115 | 130.80 | 131.27 | 130.43 | 131.20 | 124.32 |    |
| T116 | 121.76 | 120.66 | 120.29 | 117.75 | 116.13 |    |
| Y117 | 126.00 | 126.90 | 125.29 | 124.75 | 122.54 |    |
| V118 | 120.22 | 119.75 | 120.83 | 121.35 | 122.36 |    |
| Y119 | 128.37 | n      | n      | n      | 123.96 |    |
| E120 | 126.31 | n      | n      | n      | 123.73 |    |
| G121 | 102.73 | n      | n      | n      | 110.35 |    |
| V122 | 123.63 | n      | n      | n      | 120.47 | βJ |
| E123 | 126.58 | n      | n      | n      | 124.91 |    |
| A124 | 126.15 | -      | -      | -      | 125.81 |    |
| K125 | 117.07 | 117.54 | 117.67 | 116.29 | 120.54 |    |
| R126 | 121.04 | 121.82 | 121.78 | 120.60 | 122.31 |    |
| I127 | 123.65 | 124.18 | 122.93 | 122.86 | 122.23 |    |
| F128 | 126.92 | n      | n      | n      | 124.10 |    |
| K129 | 118.71 | 119.87 | 118.42 | 118.20 | 123.41 |    |
| K130 | 124.00 | 125.42 | 123.42 | 122.85 | 122.18 |    |
| D131 | 130.09 | 129.34 | 129.3  | 130.73 | 127.02 |    |

-: Due to peak overlap or weak signal, the data are not available.

n: No obvious relaxation dispersion ( $R_{ex} < 2 \text{ s}^{-1}$ ) and no minor CEST dips, implying that the chemical shifts of the minor states are similar to those of state N.

<sup>a</sup>: The chemical shifts in the unfolded state were predicted using an online predictor tool (<http://desimone.bio.ic.ac.uk/prosecco/>, Sanz-Hernández M & De Simone A, J Biomol NMR, 2017, 69:147-156).

Table S3. Amide hydrogen exchange rates ( $k_{\text{obs}}$ ) and protection factors (PF)

| Residue | $k_{\text{obs}}$ ( $\text{s}^{-1}$ ) <sup>a</sup> ,pH 7.0 | $k_{\text{rc}}$ ( $\text{s}^{-1}$ ) <sup>b</sup> ,pH 7.0 | $k_{\text{obs}}$ ( $\text{s}^{-1}$ ),pH 7.2 | PF ( $k_{\text{rc}}/k_{\text{obs}}$ ) <sup>c</sup> | Structure |
|---------|-----------------------------------------------------------|----------------------------------------------------------|---------------------------------------------|----------------------------------------------------|-----------|
| F2      | 0.4±0.1                                                   | 19.6                                                     | 0.7±0.1                                     | 49                                                 | βA        |
| D3      | 0.5±0.1                                                   | 19.8                                                     | 0.8±0.1                                     | 40                                                 |           |
| S4      | 0.8±0.2                                                   | 53.1                                                     | 1.2±0.1                                     | 66                                                 |           |
| T5      | 1.3±0.2                                                   | 57.9                                                     | 2.1±0.1                                     | 44                                                 |           |
| W6      | (7.7±0.3)×10 <sup>-4</sup>                                | 21.0                                                     | (1.2±0.1)×10 <sup>-3</sup>                  | 2.7×10 <sup>4</sup>                                |           |
| K7      | (8.2±0.4)×10 <sup>-4</sup>                                | 24.1                                                     | (1.2±0.1)×10 <sup>-3</sup>                  | 2.9×10 <sup>4</sup>                                |           |
| V8      | (7.6±0.6)×10 <sup>-3</sup>                                | 9.0                                                      | (8.6±0.7)×10 <sup>-3</sup>                  | 1.2×10 <sup>3</sup>                                |           |
| D9      | (8.6±0.4)×10 <sup>-4</sup>                                | 12.5                                                     | (1.4±0.1)×10 <sup>-3</sup>                  | 1.4×10 <sup>4</sup>                                |           |
| R10     | (1.2±0.1)×10 <sup>-3</sup>                                | 27.2                                                     | (1.7±0.1)×10 <sup>-3</sup>                  | 2.3×10 <sup>4</sup>                                |           |
| S11     | 3.4±0.2                                                   | 133                                                      | 5.4±0.2                                     | 39                                                 |           |
| E12     | (8.0±1.3)×10 <sup>-3</sup>                                | 21.1                                                     | (1.2±0.2)×10 <sup>-2</sup>                  | 2.6×10 <sup>3</sup>                                |           |
| N13     | -                                                         | 74.9                                                     | -                                           | -                                                  |           |
| Y14     | 1.0±0.2                                                   | 38.3                                                     | 1.5±0.2                                     | 38                                                 | α1        |
| D15     | 12.9±0.7                                                  | 19.3                                                     | 22.7±1.0                                    | 1.5                                                |           |
| K16     | 0.8±0.1                                                   | 20.7                                                     | 1.3±0.1                                     | 26                                                 |           |
| F17     | (5.0±0.1)×10 <sup>-4</sup>                                | 25.9                                                     | (7.4±0.1)×10 <sup>-4</sup>                  | 5.1×10 <sup>4</sup>                                |           |
| M18     | (4.6±0.1)×10 <sup>-4</sup>                                | 38.3                                                     | (6.9±0.1)×10 <sup>-4</sup>                  | 8.2×10 <sup>4</sup>                                |           |
| E19     | (6.1±0.1)×10 <sup>-4</sup>                                | 13.7                                                     | (8.5±0.1)×10 <sup>-4</sup>                  | 2.2×10 <sup>4</sup>                                |           |
| K20     | (9.4±0.2)×10 <sup>-4</sup>                                | 22.1                                                     | (1.4±0.1)×10 <sup>-3</sup>                  | 2.3×10 <sup>4</sup>                                |           |
| M21     | (1.1±0.1)×10 <sup>-3</sup>                                | 43.9                                                     | (1.4±0.1)×10 <sup>-3</sup>                  | 4.0×10 <sup>4</sup>                                |           |
| G22     | 0.2±0.1                                                   | 81.8                                                     | 0.2±0.1                                     | 409                                                |           |
| V23     | 0.2±0.1                                                   | 10.1                                                     | 0.3±0.1                                     | 50                                                 | α2        |
| N24     | 10.6±0.4                                                  | 76.4                                                     | 17.6±0.4                                    | 7                                                  |           |
| I25     | 5.4±0.3                                                   | 13.3                                                     | 8.3±0.1                                     | 2.5                                                |           |
| V26     | 1.3±0.1                                                   | 4.0                                                      | 2.2±0.1                                     | 3                                                  |           |
| K27     | 5.5±0.2                                                   | 22.5                                                     | 8.9±0.2                                     | 4                                                  |           |
| R28     | 7.7±0.6                                                   | 54.1                                                     | 12.4±0.4                                    | 7                                                  |           |
| K29     | -                                                         | 51.6                                                     | -                                           | -                                                  |           |
| L30     | 3.6±0.2                                                   | 11.8                                                     | 5.9±0.2                                     | 3.3                                                |           |
| A31     | 5.9±0.3                                                   | 21.0                                                     | 9.8±0.4                                     | 3.6                                                |           |
| A32     | 8.3±0.4                                                   | 34.1                                                     | 13.5±0.5                                    | 4.1                                                |           |
| H33     | 11.9±0.6                                                  | 57.1                                                     | 18.3±0.8                                    | 4.8                                                |           |
| D34     | 6.9±0.3                                                   | 42.1                                                     | 10.3±0.4                                    | 6.1                                                |           |
| N35     | 9.0±0.5                                                   | 70.0                                                     | 13.7±0.5                                    | 7.8                                                |           |
| L36     | 0.5±0.1                                                   | 18.7                                                     | 0.8±0.1                                     | 37                                                 | βB        |
| K37     | 0.2±0.1                                                   | 19.2                                                     | 0.2±0.1                                     | 96                                                 |           |
| L38     | -                                                         | 11.8                                                     | -                                           | -                                                  |           |
| T39     | 0.3±0.1                                                   | 17.9                                                     | 0.4±0.1                                     | 60                                                 |           |
| I40     | 0.3±0.1                                                   | 10.1                                                     | 0.5±0.1                                     | 34                                                 |           |
| T41     | 1.4±0.2                                                   | 17.1                                                     | 2.0±0.1                                     | 12                                                 |           |
| Q42     | 0.3±0.1                                                   | 62.1                                                     | 0.6±0.1                                     | 207                                                |           |
| E43     | 0.3±0.1                                                   | 16.8                                                     | 0.5±0.1                                     | 56                                                 |           |
| G44     | -                                                         | 45.1                                                     | -                                           | -                                                  |           |
| N45     | 10.9±0.7                                                  | 156                                                      | 17.4±0.4                                    | 14                                                 |           |
| K46     | 0.7±0.1                                                   | 65.0                                                     | 1.1±0.1                                     | 93                                                 |           |

|     |                            |      |                            |                         |    |
|-----|----------------------------|------|----------------------------|-------------------------|----|
| F47 | -                          | 25.9 | -                          | -                       | βC |
| T48 | 2.4±0.2                    | 33.3 | 3.4±0.2                    | 14                      |    |
| V49 | 0.2±0.1                    | 10.8 | 0.2±0.1                    | 52                      |    |
| K50 | 0.2±0.1                    | 22.5 | 0.3±0.1                    | 112                     |    |
| E51 | 0.02-0.2                   | 14.0 | 0.02-0.2                   | 70-700                  |    |
| S52 | 0.2±0.1                    | 56.8 | 0.3±0.1                    | 284                     |    |
| S53 | 0.5±0.1                    | 160  | 0.8±0.1                    | 320                     |    |
| A54 | -                          | 68.1 | -                          | -                       | βD |
| F55 | 3.9±0.2                    | 19.6 | 6.5±0.2                    | 5.0                     |    |
| R56 | 1.5±0.1                    | 47.1 | 2.4±0.1                    | 31                      |    |
| N57 | -                          | 175  | -                          | -                       |    |
| I58 | 0.2±0.1                    | 13.3 | 0.2±0.1                    | 66                      |    |
| E59 | 2.3±0.1                    | 6.2  | 3.6±0.1                    | 2.7                     |    |
| C60 | 0.02-0.2                   | 86.0 | 0.02-0.2                   | 430-4.3x10 <sup>3</sup> |    |
| V61 | 0.02-0.2                   | 19.6 | 0.02-0.2                   | 98-980                  |    |
| F62 | (7.1±0.1)x10 <sup>-4</sup> | 14.2 | (1.1±0.1)x10 <sup>-3</sup> | 2.0x10 <sup>4</sup>     |    |
| E63 | (3.2±0.2)x10 <sup>-3</sup> | 12.2 | (4.8±0.4)x10 <sup>-3</sup> | 3.8x10 <sup>3</sup>     |    |
| L64 | (3.8±0.3)x10 <sup>-3</sup> | 6.4  | (5.3±0.4)x10 <sup>-3</sup> | 1.7x10 <sup>3</sup>     | βE |
| G65 | (5.3±0.5)x10 <sup>-3</sup> | 39.2 | (1.4±0.4)x10 <sup>-2</sup> | 7.4x10 <sup>3</sup>     |    |
| V66 | (6.4±0.1)x10 <sup>-4</sup> | 10.1 | (1.0±0.1)x10 <sup>-3</sup> | 1.6x10 <sup>4</sup>     |    |
| T67 | 9.9±0.5                    | 21.0 | 16.9±0.5                   | 2.1                     |    |
| F68 | (7.1±0.7)x10 <sup>-3</sup> | 31.1 | (7.3±0.8)x10 <sup>-3</sup> | 4.4x10 <sup>3</sup>     |    |
| N69 | 0.2±0.1                    | 121  | 0.4±0.1                    | 605                     |    |
| C70 | (9.4±2.3)x10 <sup>-3</sup> | 253  | 0.02-0.2                   | 2.7x10 <sup>4</sup>     |    |
| N71 | 5.9±0.3                    | 304  | 9.1±0.1                    | 52                      |    |
| L72 | (4.5±0.4)x10 <sup>-3</sup> | 18.7 | (6.8±0.5)x10 <sup>-3</sup> | 4.2x10 <sup>3</sup>     |    |
| A73 | -                          | 21.0 | -                          | -                       |    |
| D74 | 7.8±0.3                    | 17.2 | 12.7±0.4                   | 2.2                     |    |
| G75 | 2.2±0.2                    | 42.2 | 3.7±0.1                    | 19                      |    |
| T76 | 2.5±0.1                    | 42.9 | 3.1±0.1                    | 17                      |    |
| E77 | 0.4±0.1                    | 16.8 | 0.6±0.1                    | 42                      |    |
| L78 | (9.9±0.4)x10 <sup>-4</sup> | 6.4  | (1.5±0.1)x10 <sup>-3</sup> | 6.5x10 <sup>3</sup>     |    |
| R79 | (6.2±0.1)x10 <sup>-5</sup> | 25.3 | (1.2±0.1)x10 <sup>-4</sup> | 4.1x10 <sup>5</sup>     |    |
| G80 | (1.3±0.1)x10 <sup>-3</sup> | 105  | (1.8±0.1)x10 <sup>-3</sup> | 7.8x10 <sup>4</sup>     |    |
| T81 | (6.2±0.1)x10 <sup>-5</sup> | 42.9 | (1.3±0.1)x10 <sup>-4</sup> | 7.0x10 <sup>5</sup>     |    |
| W82 | (5.0±0.3)x10 <sup>-5</sup> | 21.0 | (1.1±0.1)x10 <sup>-4</sup> | 4.2x10 <sup>5</sup>     |    |
| S83 | (5.8±0.2)x10 <sup>-5</sup> | 62.1 | (1.2±0.1)x10 <sup>-4</sup> | 1.1x10 <sup>6</sup>     |    |
| L84 | 0.7±0.1                    | 17.9 | 1.0±0.1                    | 26                      | βG |
| E85 | (6.8±0.9)x10 <sup>-3</sup> | 6.5  | (1.5±0.1)x10 <sup>-3</sup> | 956                     |    |
| G86 | -                          | 45.1 | -                          | -                       |    |
| N87 | 8.5±0.4                    | 156  | 13.2±0.4                   | 18                      |    |
| K88 | (1.8±0.1)x10 <sup>-3</sup> | 65.0 | (2.4±0.1)x10 <sup>-3</sup> | 3.6x10 <sup>4</sup>     |    |
| L89 | (2.9±0.1)x10 <sup>-5</sup> | 11.8 | (7.0±0.2)x10 <sup>-5</sup> | 4.1x10 <sup>5</sup>     |    |
| I90 | (1.9±0.1)x10 <sup>-5</sup> | 3.9  | (4.7±0.2)x10 <sup>-5</sup> | 2.1x10 <sup>5</sup>     |    |
| G91 | (7.2±0.2)x10 <sup>-5</sup> | 37.4 | (1.5±0.1)x10 <sup>-4</sup> | 5.2x10 <sup>5</sup>     |    |
| K92 | (3.0±0.1)x10 <sup>-4</sup> | 46.0 | (5.0±0.1)x10 <sup>-4</sup> | 1.6x10 <sup>5</sup>     |    |
| F93 | (1.5±0.1)x10 <sup>-4</sup> | 25.9 | (2.8±0.1)x10 <sup>-4</sup> | 1.8x10 <sup>5</sup>     |    |
| K94 | (4.5±0.1)x10 <sup>-4</sup> | 35.7 | (7.0±0.1)x10 <sup>-4</sup> | 8.0x10 <sup>4</sup>     |    |

|      |                              |      |                              |                      |           |
|------|------------------------------|------|------------------------------|----------------------|-----------|
| R95  | $(7.3\pm 0.6)\times 10^{-4}$ | 54.1 | $(1.8\pm 0.6)\times 10^{-3}$ | $7.4\times 10^4$     |           |
| T96  | $0.7\pm 0.1$                 | 48.2 | $1.2\pm 0.1$                 | 69                   |           |
| D97  | $0.3\pm 0.1$                 | 27.3 | $0.4\pm 0.1$                 | 91                   |           |
| N98  | $0.5\pm 0.1$                 | 70.0 | $0.9\pm 0.1$                 | 140                  |           |
| G99  | $0.3\pm 0.1$                 | 133  | $0.4\pm 0.1$                 | 443                  |           |
| N100 | $(5.6\pm 0.3)\times 10^{-3}$ | 156  | $(1.0\pm 0.1)\times 10^{-2}$ | $2.8\times 10^4$     | $\beta$ H |
| E101 | $(1.6\pm 0.6)\times 10^{-2}$ | 22.1 | 0.02-0.2                     | $1.4\times 10^3$     |           |
| L102 | $(3.6\pm 0.1)\times 10^{-4}$ | 6.4  | $(5.9\pm 0.1)\times 10^{-4}$ | $1.8\times 10^4$     |           |
| N103 | $(8.8\pm 0.2)\times 10^{-4}$ | 65.0 | $(1.2\pm 0.1)\times 10^{-3}$ | $7.4\times 10^4$     |           |
| T104 | $(9.8\pm 0.2)\times 10^{-4}$ | 60.7 | $(1.3\pm 0.1)\times 10^{-3}$ | $6.2\times 10^4$     |           |
| V105 | $(4.3\pm 0.1)\times 10^{-4}$ | 10.8 | $(6.1\pm 0.1)\times 10^{-4}$ | $2.5\times 10^4$     |           |
| R106 | $(5.2\pm 0.1)\times 10^{-4}$ | 29.7 | $(6.9\pm 0.1)\times 10^{-4}$ | $5.7\times 10^4$     |           |
| E107 | $(5.5\pm 0.2)\times 10^{-4}$ | 17.6 | $(6.8\pm 0.2)\times 10^{-4}$ | $3.2\times 10^4$     |           |
| I108 | $(2.0\pm 0.1)\times 10^{-3}$ | 4.5  | $(2.5\pm 0.1)\times 10^{-3}$ | $2.3\times 10^3$     |           |
| I109 | $(3.5\pm 0.1)\times 10^{-4}$ | 3.7  | $(5.5\pm 0.1)\times 10^{-4}$ | $1.1\times 10^4$     |           |
| G110 | $6.4\pm 0.1$                 | 37.4 | $9.4\pm 0.3$                 | 5.8                  |           |
| D111 | $1.2\pm 0.1$                 | 25.5 | $1.7\pm 0.1$                 | 21                   |           |
| E112 | $(3.3\pm 0.1)\times 10^{-4}$ | 7.0  | $(5.3\pm 0.1)\times 10^{-4}$ | $2.1\times 10^4$     | $\beta$ I |
| L113 | $(2.1\pm 0.1)\times 10^{-4}$ | 6.4  | $(3.3\pm 0.1)\times 10^{-4}$ | $3.1\times 10^4$     |           |
| V114 | $(6.2\pm 0.2)\times 10^{-5}$ | 4.2  | $(1.4\pm 0.1)\times 10^{-4}$ | $6.7\times 10^4$     |           |
| Q115 | $(3.5\pm 0.1)\times 10^{-4}$ | 28.4 | $(5.4\pm 0.1)\times 10^{-4}$ | $8.2\times 10^4$     |           |
| T116 | $(5.1\pm 0.2)\times 10^{-4}$ | 46.0 | $(8.0\pm 0.2)\times 10^{-4}$ | $9.0\times 10^4$     |           |
| Y117 | $(1.8\pm 0.1)\times 10^{-4}$ | 29.0 | $(3.2\pm 0.1)\times 10^{-4}$ | $1.6\times 10^5$     |           |
| V118 | $(1.1\pm 0.1)\times 10^{-4}$ | 7.6  | $(2.0\pm 0.1)\times 10^{-4}$ | $6.9\times 10^4$     |           |
| Y119 | $(1.2\pm 0.1)\times 10^{-4}$ | 13.3 | $(2.2\pm 0.1)\times 10^{-4}$ | $1.1\times 10^5$     |           |
| E120 | $0.3\pm 0.1$                 | 11.9 | $0.4\pm 0.1$                 | 40                   |           |
| G121 | 0.02-0.2                     | 45.1 | $0.2\pm 0.1$                 | $226-2.3\times 10^3$ |           |
| V122 | $(6.2\pm 0.1)\times 10^{-4}$ | 10.1 | $(9.2\pm 0.1)\times 10^{-4}$ | $1.6\times 10^4$     | $\beta$ J |
| E123 | $(6.1\pm 0.4)\times 10^{-3}$ | 7.7  | $(7.1\pm 0.5)\times 10^{-3}$ | $1.3\times 10^3$     |           |
| A124 | $(7.7\pm 0.2)\times 10^{-4}$ | 24.2 | $(9.2\pm 0.2)\times 10^{-4}$ | $3.1\times 10^4$     |           |
| K125 | $(1.1\pm 0.1)\times 10^{-3}$ | 31.1 | $(1.5\pm 0.1)\times 10^{-3}$ | $2.8\times 10^4$     |           |
| R126 | $(1.1\pm 0.1)\times 10^{-3}$ | 54.1 | $(1.4\pm 0.1)\times 10^{-3}$ | $4.9\times 10^4$     |           |
| I127 | $(4.8\pm 0.2)\times 10^{-4}$ | 10.5 | $(6.9\pm 0.2)\times 10^{-4}$ | $2.2\times 10^4$     |           |
| F128 | $(8.4\pm 0.3)\times 10^{-4}$ | 11.6 | $(1.1\pm 0.1)\times 10^{-3}$ | $1.4\times 10^4$     |           |
| K129 | $(9.8\pm 0.5)\times 10^{-4}$ | 35.7 | $(1.3\pm 0.1)\times 10^{-3}$ | $3.6\times 10^4$     |           |
| K130 | $(4.3\pm 0.2)\times 10^{-3}$ | 41.0 | $(5.6\pm 0.2)\times 10^{-3}$ | $9.5\times 10^3$     |           |
| D131 | $(3.4\pm 0.1)\times 10^{-3}$ | 0.4  | $(3.8\pm 0.1)\times 10^{-3}$ | 118                  |           |

-: due to peak overlap or weak signal, the data are not available.

<sup>a</sup>: For the exchange rates larger than  $0.2\text{ s}^{-1}$ , they were measured by the amide hydrogen exchange method in 95% H<sub>2</sub>O and 5% D<sub>2</sub>O. For the rates smaller than  $0.02\text{ s}^{-1}$ , they were measured by the H-D exchange method.

<sup>b</sup>: krc was predicted using an online software tool

(<https://protocol.fccc.edu/research/labs/roder/sphere/sphere.html>, Bai, Milne, Mayne & Englander, *Proteins* 17: 75-86 (1993)). The reference data are from alanine in oligo-peptide.

<sup>c</sup>: Protection Factor (PF) was calculated from the data at pH 7.0.

Table S4. Comparison of fitting results derived from the stopped-flow data at low oleic acid concentrations using the bi- and mono-exponential models.

| Oleic acid concentration ( $\mu\text{M}$ ) | Bi-exponential model |         |            | Mono-exponential model |                    | F-statistic |
|--------------------------------------------|----------------------|---------|------------|------------------------|--------------------|-------------|
|                                            | $k_1^a$              | $k_2^b$ | $\chi^2^c$ | $k_1^d$                | $\chi^2$           |             |
| 10.0                                       | 426                  | 16      | 1.698      | 394                    | 1.998              | 87.9        |
| 12.5                                       | 561                  | 25      | 3.604      | 471                    | 5.405              | 248.2       |
| 15.0                                       | 716                  | 30      | 1.718      | 564                    | 3.449              | 500.8       |
| 17.5                                       | 807                  | 29      | 1.964      | 710                    | 2.505              | 136.7       |
| 25.0                                       | -                    | -       | -          | 956 <sup>e</sup>       | 2.010 <sup>e</sup> | -           |
| 35.0                                       | -                    | -       | -          | 1010 <sup>e</sup>      | 2.312 <sup>e</sup> | -           |

<sup>a</sup>: apparent association rate for the fast step.

<sup>b</sup>: apparent association rate for the slow step.

<sup>c</sup>: sum of squared residuals.

<sup>d</sup>: apparent association rate for a one-step association.

<sup>e</sup>: the results were obtained by fitting the data points within a mixing time of 10 ms.



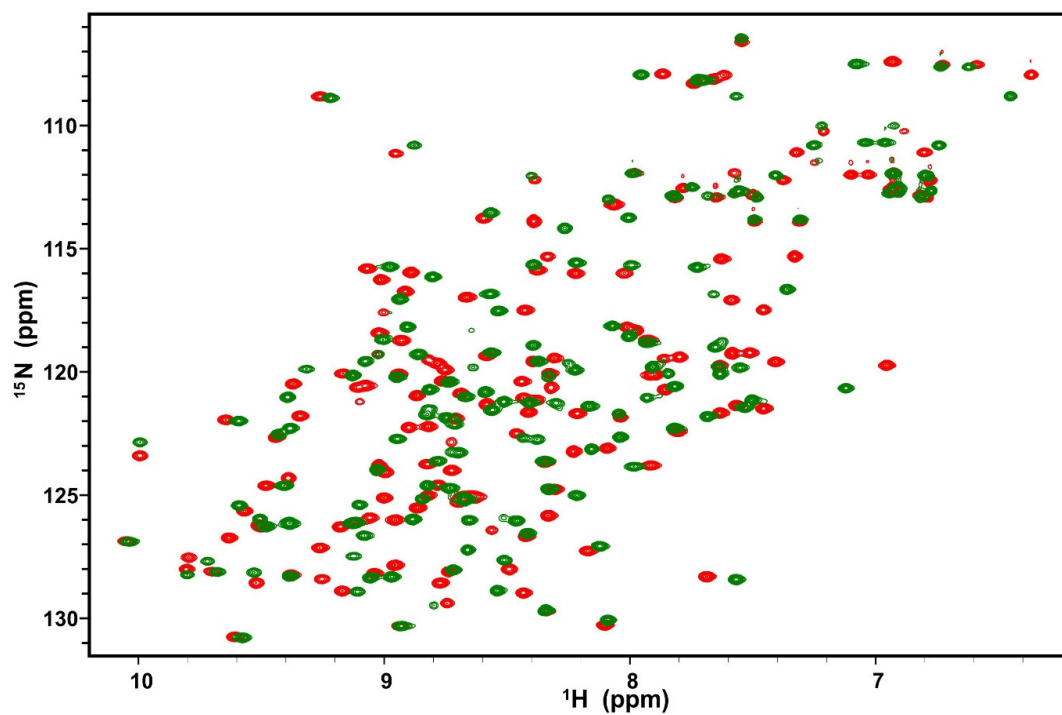

Figure S1.  $^1\text{H}$ - $^{15}\text{N}$  HSQC spectra of reduced (red, in presence of DTT) and oxidized hIFABP V60C/Y70C variant (green, in the absence of DTT).

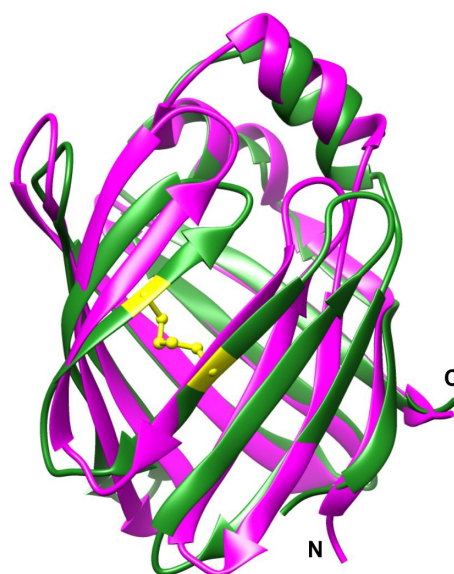

Figure S2. Structure comparison of WT hIFABP (pink) and its variant (dark green).

The disulfide linkage is displayed in sticks and balls (yellow).

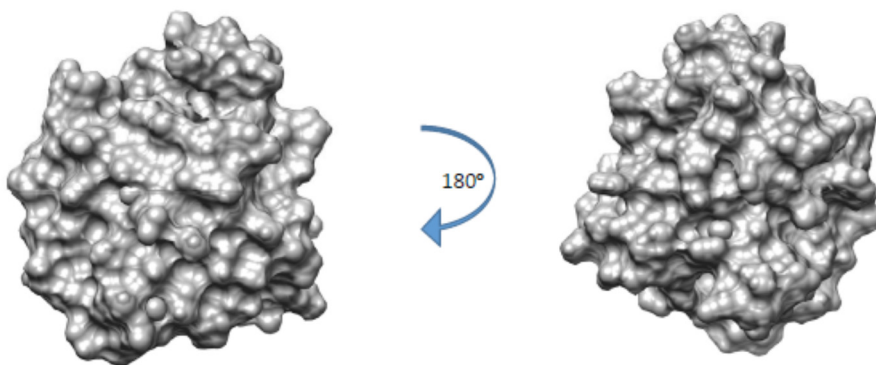

Figure S3. Surface representation of gap-closed hIFABP variant. The structure in the left panel has the same orientation as the structure in Figure S2.

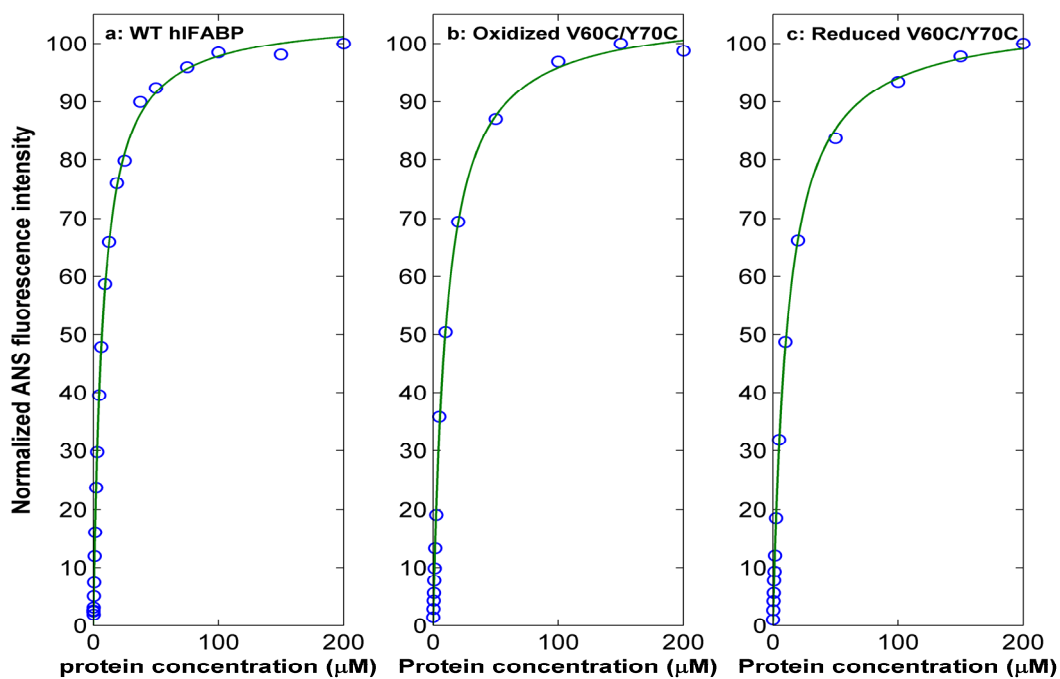

Figure S4. Dependence of ANS fluorescence intensities on concentrations of WT hIFABP (a) and oxidized (b) and reduced (c) V60C/Y70C variants. Experimental data are indicated by 'o', while the best fits are shown in solid lines.

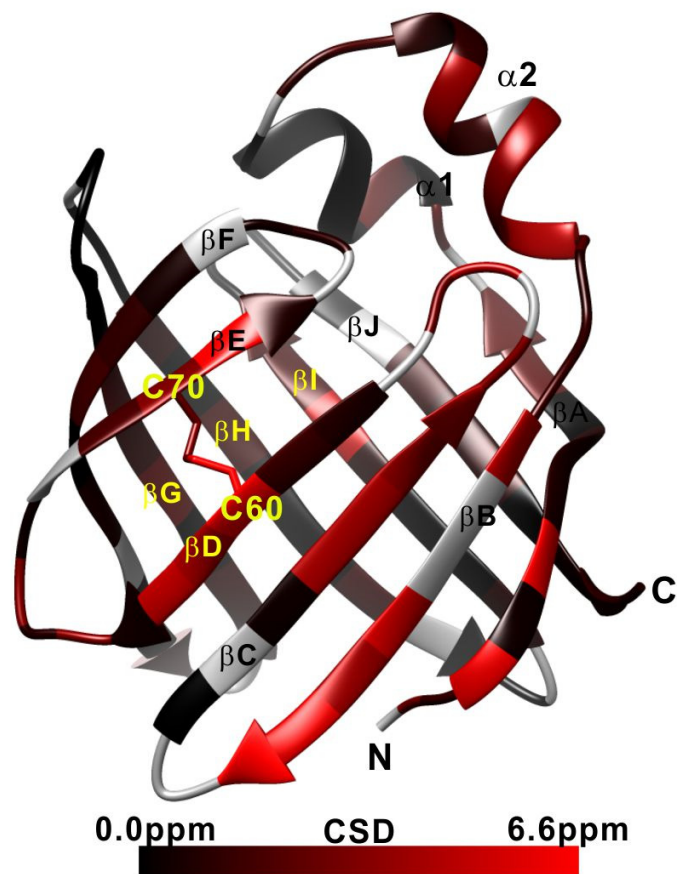

Figure S5.  $^{15}\text{N}$  chemical shift differences (CSD) of states N and I3 mapped onto the 3D structure of the gap-closed mutant. The differences are color-coded. The residues with unavailable data are indicated in gray.

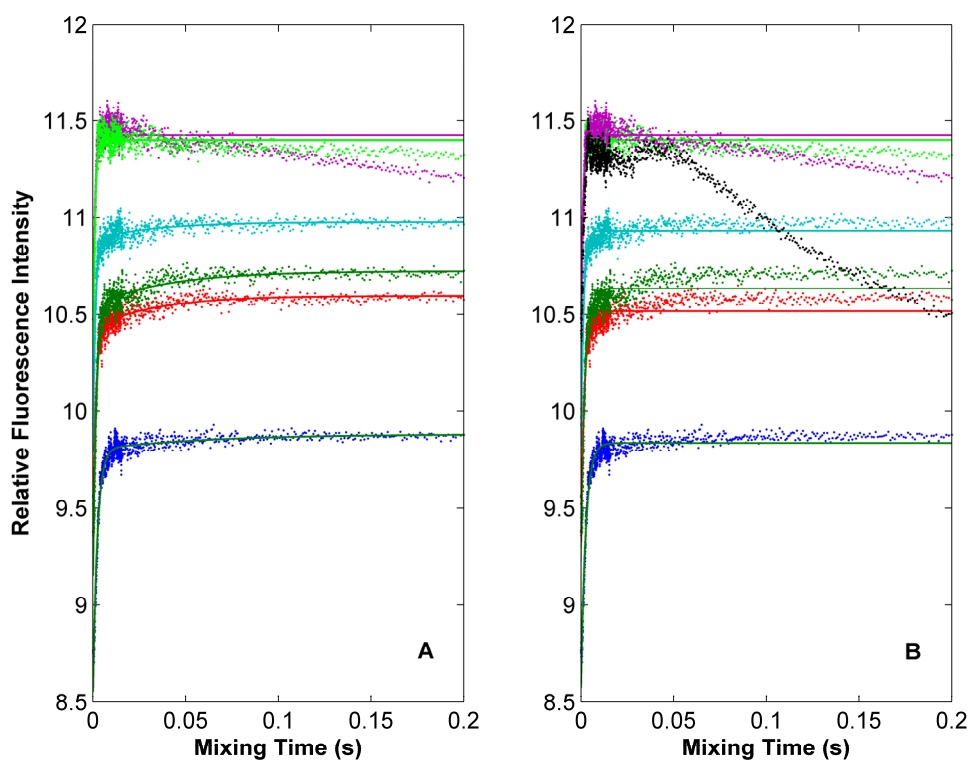

Figure S6. Stopped-flow traces (dots) of the hIFABP V60C/Y70C variant recorded at 20 °C, and their best fits (solid lines) to a double exponential function (A, at concentrations smaller than 25  $\mu\text{M}$ ) and single exponential function (A, at concentrations of 25 and 35  $\mu\text{M}$ , and B). The traces were recorded at final oleic acid concentrations of 10  $\mu\text{M}$  (blue), 12.5  $\mu\text{M}$  (red), 15  $\mu\text{M}$  (dark green), 17.5  $\mu\text{M}$  (cyan), 25  $\mu\text{M}$  (green), 35  $\mu\text{M}$  (purple), and 50  $\mu\text{M}$  (black).
